# Supplementary material
Source: Research Square preprint supplement (doi:10.21203/rs.3.rs-9485947/v1)
Supplement: Supplementary file 1 [file f767b48128dc9f36338adf6a.docx]

**Supplementary Materials**

**Supplementary Table S1.** Calinski-Harabasz index values for K-means clustering solutions (K = 2 to K = 5) in CHARLS and ELSA.

| **Cohort** | **K = 2** | **K = 3** | **K = 4** | **K = 5** |
| --- | --- | --- | --- | --- |
| CHARLS | 449.9 | 350.0 | 305.7 | 277.9 |
| ELSA | 2533.0 | 2194.8 | 1875.5 | 1636.0 |

*The three-cluster solution (K = 3) was selected in both cohorts based on the Calinski-Harabasz index values and clinical interpretability. Higher values indicate better cluster separation. Although K = 2 yielded the highest index in both cohorts, it was considered insufficient for capturing the full spectrum of ABSI variability.*

**Supplementary Table S2.** Wave-specific A Body Shape Index values by trajectory group in CHARLS and ELSA.

| **Cohort / Trajectory** | **N** | **Wave 1** | **Wave 2** | **Wave 3** | **Cumulative** |
| --- | --- | --- | --- | --- | --- |
| **CHARLS (2011-2015)** |  | W1 (2011) | W2 (2013) | W3 (2015) | Mean |
| Stable-Low | 222 | 0.0796 (0.0043) | 0.0810 (0.0045) | 0.0796 (0.0045) | 0.0801 (0.0022) |
| Stable-Medium | 410 | 0.0845 (0.0037) | 0.0859 (0.0042) | 0.0850 (0.0035) | 0.0851 (0.0016) |
| Stable-High | 179 | 0.0913 (0.0049) | 0.0921 (0.0050) | 0.0907 (0.0049) | 0.0914 (0.0028) |
| **ELSA (2004-2012)** |  | W2 (2004) | W4 (2008) | W6 (2012) | Mean |
| Stable-Low | 646 | 0.0749 (0.0033) | 0.0759 (0.0034) | 0.0760 (0.0037) | 0.0756 (0.0024) |
| Stable-Medium | 1,004 | 0.0809 (0.0027) | 0.0822 (0.0028) | 0.0819 (0.0030) | 0.0817 (0.0016) |
| Stable-High | 667 | 0.0861 (0.0029) | 0.0872 (0.0029) | 0.0875 (0.0035) | 0.0869 (0.0021) |

*Values are mean (standard deviation) of A Body Shape Index at each measurement wave. Cumulative ABSI was defined as the arithmetic mean of the three wave-specific values. All between-group differences were statistically significant (P < 0.001 by one-way ANOVA at each wave).*

**Supplementary Table S3.** Fully adjusted logistic regression results (Model 3) showing odds ratios for all covariates in CHARLS and ELSA.

| **Variable** | **CHARLS odds ratio (95% CI)** | **P** | **ELSA odds ratio (95% CI)** | **P** |
| --- | --- | --- | --- | --- |
| Trajectory (ref: Stable-Low) |  |  |  |  |
| Stable-Medium | 1.83 (1.23, 2.72) | 0.003 | 1.67 (1.30, 2.13) | <0.001 |
| Stable-High | 2.25 (1.38, 3.67) | 0.001 | 2.16 (1.60, 2.93) | <0.001 |
| Age (per year) | 0.97 (0.94, 1.00) | 0.057 | 0.98 (0.96, 0.99) | <0.001 |
| Sex (ref: Male) |  |  |  |  |
| Female | 3.17 (2.01, 5.07) | <0.001 | 1.22 (0.97, 1.54) | 0.086 |
| Education (ref: Less than high school) |  |  |  |  |
| High school | 0.46 (0.07, 1.96) | 0.350 | 0.68 (0.53, 0.87) | 0.002 |
| College and above | 2.68 (1.08, 6.69) | 0.033 | 0.80 (0.65, 0.99) | 0.042 |
| Marital (ref: Married/partnered) |  |  |  |  |
| Other | 1.31 (0.88, 1.97) | 0.183 | 1.09 (0.88, 1.34) | 0.446 |
| Smoking (ref: Never) |  |  |  |  |
| Ever | 1.06 (0.69, 1.66) | 0.790 | 1.20 (0.99, 1.46) | 0.059 |
| Alcohol consumption |  |  |  |  |
| CHARLS: Moderate (ref: Heavy) | 1.61 (0.76, 3.36) | 0.208 |  |  |
| CHARLS: None (ref: Heavy) | 1.51 (0.92, 2.49) | 0.106 |  |  |
| ELSA: Non-drinker (ref: Drinker) |  |  | 1.08 (0.77, 1.49) | 0.669 |
| Location (ref: Rural, CHARLS only) |  |  |  |  |
| Urban | 1.05 (0.67, 1.65) | 0.824 |  |  |
| Physical activity (ref: Sedentary) |  |  |  |  |
| Low | 1.15 (0.68, 1.97) | 0.601 | 1.68 (0.95, 3.06) | 0.083 |
| Moderate | 0.95 (0.56, 1.61) | 0.840 | 1.34 (0.80, 2.35) | 0.283 |
| Vigorous | 0.48 (0.27, 0.84) | 0.010 | 1.22 (0.72, 2.16) | 0.471 |

*Values are odds ratios (95% confidence intervals) from multivariable logistic regression. CHARLS Model 3 adjusted for age, sex, education, marital status, smoking, alcohol consumption, residential location, and physical activity. ELSA Model 3 adjusted for the same covariates excluding residential location. Empty cells indicate variables not applicable to that cohort.*
